# Supplementary material for: Family presence in Canadian PICUs during the COVID-19 pandemic: a mixed-methods environmental scan of policy and practice
Source: PubMed Central journal article supplement — CMAJ Open. 2022 Jul 5;10(3):E622–32. doi: 10.9778/cmajo.20210202 (PMC9262350; doi:10.9778/cmajo.20210202), 2022-07-05
Supplement: open-2021-0202-1-at.pdf [file open-2021-0202-1-at.pdf]

### Questionnaire

I want to review a couple of key pieces of information from the consent. We will be audio recording this interview so that we can fill in any details that I miss while I'm asking questions. Is it okay to turn the recorder on?

A reminder that your responses are confidential and will not be tied directly to you or your hospital. We will not be identify you or your hospital by name, and results will only be reported in aggregate.

If there are any questions you do not wish to answer or do not know the answer to them, we can skip the question or you can look them up as we go. After we have filled out the questionnaire with your answers, we will send it to you so that you can check it over and fill in any blanks or make any corrections

\*\*Interviewer instructions: Use back of page to continue writing if extra space needed.

#### PICU Information:

1. Hospital type:

- Stand-alone children's hospital
- Children's hospital within a hospital
- Women's and Children's

2. ICU type:

- Med-surg
- Cardiac
- Mixed

3. Patient age range: \_\_\_\_\_

4. # Beds: \_\_\_\_\_

5. What is your role in the PICU?

- PICU physician chief
- Pediatric intensivist (not physician head)
- PICU Operations manager
- Broader hospital director
- Other \_\_\_\_\_

#### Baseline Family Presence Policy

6. In the period BEFORE the COVID-19 pandemic, what were the **PICU** visitation policies?:

Number, type: \_\_\_\_\_

Appendix 1, as supplied by authors. Appendix to: Foster JR, Lee LA, Seabrook JA, et al. Family presence in Canadian PICUs during the COVID-19 pandemic: a mixed-methods environmental scan of policy and practice.

*CMAJ Open* 2022. DOI:10.9778/cmajo.20210202. Copyright © 2022 The Author(s) or their employer(s).

To receive this resource in an accessible format, please contact us at [cmajgroup@cmaj.ca](mailto:cmajgroup@cmaj.ca).

Family vs visitor rules: \_\_\_\_\_

Times: \_\_\_\_\_

If limited, when: \_\_\_\_\_

- 7. In the period Before the COVID-19 pandemic, did the Children’s Hospital and your PICU within it have the same family presence policies with respect to family presence, number of visitors, visitation times, and mobility of visitors around the hospital? Yes / no / unsure

(If they were the same, skip question 8. If different, go to question 9)

- 8. In the period BEFORE the pandemic, what were the **hospital** visitation policies?:

Number, type: \_\_\_\_\_

Family vs visitor rules: \_\_\_\_\_

Times: \_\_\_\_\_

If limited, when: \_\_\_\_\_

**COVID-ERA Policy Design:**

- 9. Did your PICU follow the hospital-wide policies for family presence and visitation with children during the pandemic, or did they have a different set of rules?

\_\_\_\_\_

- 10. How much variation was there in the rules for different areas or units of the hospital?

\_\_\_\_\_

- a. If there were differences, what accounted for these?

\_\_\_\_\_

- 11. Once COVID started, how were **Hospital wide** policies about parental presence and visitation for your children’s hospital determined? (Provincially, regionally, locally, within the hospital?)

\_\_\_\_\_

- 12. Were PICU leaders consulted when determining the **hospital-wide policies** and practices? (circle one) Yes/ no If YES, what was the input? \_\_\_\_\_

- 13. Were PICU families consulted when determining the **hospital-wide policies** and practices? (circle one) Yes/ no If YES, what was the input? \_\_\_\_\_

- 14. Did your PICU follow the hospital-wide policies for family presence and visitation with children during the pandemic, or did they have a different set of rules?

\_\_\_\_\_

15. Was PICU leadership consulted about the **PICU-specific** family presence policies during the beginning of the Covid-19 pandemic? Yes / no

a. If Yes: What was the role/input of PICU leadership?

\_\_\_\_\_

b. If no: How were you informed of the new visitation policies?

\_\_\_\_\_

16. Were PICU families consulted about the **PICU-specific** family presence policies during the beginning of the Covid-19 pandemic? Yes / no

a. If YES, what was the role/input of PICU families?

\_\_\_\_\_

\*For interviewer: If the PICU and hospital rules/policies were the same, just ask about the policies/rules with respect to PICU (skip to question 21). If they were different, tell the respondent that you will be asking about the rules for the hospital, and then about the PICU. Ask about hospital policies, then PICU policies.

**Hospital Restricted family presence policy**

This section is additional recording space for HOSPITAL policies that are different than PICU (page with questions 17-21 repeated for the pediatric section of the HOSPITAL)

**Safety Measures:**

17. What was the screening or testing process for visitors and family members staying with children in the PICU?

- COVID test before allowed to visit
- Screening questions at admission
- Screening questions asked regularly
- Daily screening for symptoms
- Screening for fever on entrance

18. Were visitors or family members required to wear PPE? Yes / no

a. If yes, what PPE and in what circumstances? (e.g. in the room, wandering the hospital?)

\_\_\_\_\_

b. Was this different for covid or non-covid patients? yes / no If yes, explain:

\_\_\_\_\_

**Initial Restrictive Policy and Practice**

19. Was the initial pandemic visitation policy in your PICU the same for COVID-19 presumed/suspected/proven and non-COVID-19 patients? (if different, need to ask these questions twice, once for COVID-19 and once for non-COVID-19) (yes / no)

Appendix 1, as supplied by authors. Appendix to: Foster JR, Lee LA, Seabrook JA, et al. Family presence in Canadian PICUs during the COVID-19 pandemic: a mixed-methods environmental scan of policy and practice. *CMAJ Open* 2022. DOI:10.9778/cmajo.20210202. Copyright © 2022 The Author(s) or their employer(s). To receive this resource in an accessible format, please contact us at [cmajgroup@cmaj.ca](mailto:cmajgroup@cmaj.ca).

20. What was the initial pandemic visitation policy in your PICU? (let the respondent talk, tick boxes as they do. May ask follow-up questions if not all questions are answered).

| <u>COVID (or All if same)</u>                                                                                                                                                                                 | <u>Non-COVID (if different)</u>                                             |
|---------------------------------------------------------------------------------------------------------------------------------------------------------------------------------------------------------------|-----------------------------------------------------------------------------|
| 1. Number of visitors at one time:                                                                                                                                                                            |                                                                             |
| <input type="checkbox"/> None                                                                                                                                                                                 | <input type="checkbox"/> None                                               |
| <input type="checkbox"/> One                                                                                                                                                                                  | <input type="checkbox"/> One                                                |
| <input type="checkbox"/> Two                                                                                                                                                                                  | <input type="checkbox"/> Two                                                |
| <input type="checkbox"/> No limit                                                                                                                                                                             | <input type="checkbox"/> No limit                                           |
| <input type="checkbox"/> Other: _____                                                                                                                                                                         | <input type="checkbox"/> Other: _____                                       |
| 2. Timing of support person/people staying with the child                                                                                                                                                     |                                                                             |
| <input type="checkbox"/> 24/7                                                                                                                                                                                 | <input type="checkbox"/> 24/7                                               |
| <input type="checkbox"/> Restricted to a certain # hours per day. Describe:                                                                                                                                   | <input type="checkbox"/> Restricted to a certain # hours per day. Describe: |
| <input type="checkbox"/> Other: _____                                                                                                                                                                         | <input type="checkbox"/> Other: _____                                       |
| 3. If only one/two visitors allowed, were families allowed to “switch out”?                                                                                                                                   |                                                                             |
| Yes / no                                                                                                                                                                                                      | yes / no                                                                    |
| i. If so, how often?                                                                                                                                                                                          |                                                                             |
| _____                                                                                                                                                                                                         | _____                                                                       |
| ii. When switching out happened (either it was allowed or because of an exception), how was it managed (i.e. could parents switch out in the hospital or did one have to leave before the other could enter)? |                                                                             |
| _____                                                                                                                                                                                                         | _____                                                                       |
| 4. Were/Are there different policies for patients of different ages? If yes describe.                                                                                                                         |                                                                             |
| Yes / no                                                                                                                                                                                                      | yes / no                                                                    |
| _____                                                                                                                                                                                                         | _____                                                                       |
| 5. For what reasons are/were the visitor(s) allowed to leave the patient room:                                                                                                                                |                                                                             |
| <input type="checkbox"/> May not leave room                                                                                                                                                                   | <input type="checkbox"/> Food                                               |
| <input type="checkbox"/> Unrestricted                                                                                                                                                                         | <input type="checkbox"/> Smoking                                            |
| <input type="checkbox"/> Toilet                                                                                                                                                                               | <input type="checkbox"/> Sleeping                                           |

- To leave building
- If overly distressed
- Other: \_\_\_\_\_
- May not leave room
- Unrestricted
- Toilet

- Food
- Smoking
- Sleeping
- To leave building
- If overly distressed
- Other: \_\_\_\_\_

21. How were families informed of the new policies related to visitation and presence in the PICU?

Initially: \_\_\_\_\_

Ongoing: \_\_\_\_\_

22. What were your rounding practices related to family presence pre-pandemic?

\_\_\_\_\_

23. What were your rounding practices related to family presence during the early part of the pandemic?

\_\_\_\_\_

a. If the family was not involved in rounds directly, how did you ensure that families were updated on their child’s status and care plans?

\_\_\_\_\_

24. Has there been evolution in the rounding practices during the pandemic?

\_\_\_\_\_

25. Did you use virtual technology in your rounding during COVID-19?

\_\_\_\_\_

**Policy Exceptions and Exemptions:**

26. What was the process for requesting and deciding whether exemptions should be granted?

\_\_\_\_\_

27. **For units that have a restriction in visitors**, please list reasons for which an exception would be made to the visitation policy

\_\_\_\_\_

28. Since the beginning of the COVID-19 pandemic, how have the family presence and visitation rules in your PICU changed and what is the current rule?

\_\_\_\_\_

Appendix 1, as supplied by authors. Appendix to: Foster JR, Lee LA, Seabrook JA, et al. Family presence in Canadian PICUs during the COVID-19 pandemic: a mixed-methods environmental scan of policy and practice. CMAJ Open 2022. DOI:10.9778/cmajo.20210202. Copyright © 2022 The Author(s) or their employer(s). To receive this resource in an accessible format, please contact us at cmajgroup@cmaj.ca.

PPE: \_\_\_\_\_

Rounds: \_\_\_\_\_

# Caregivers present: \_\_\_\_\_

Caregiver role including siblings: \_\_\_\_\_

Switches: \_\_\_\_\_

Exceptions: \_\_\_\_\_

**Scenarios:**

Please consider how you, as a leader with some decision-making capacity, would have responded during the first phase of the COVID-19 Pandemic; does not reflect what you as a person would want to do, but what you would have been likely to do in your leadership role.

29. You have admitted a 3 year old with a new diagnosis of intracranial malignancy. Would you allow 2 parents/an increase in visitors for:

- Admission process
- Return from the OR post-surgically
- Delivering news of the diagnosis
- Child deteriorates and needs intubated
- Parent not coping well, becomes highly agitated and anxious
- Parent highly distressed/upset
- Child highly distressed
- Discussions of withdrawal of life support
- Visitation prior to WLS
- Withdrawal of Life Support

30. You have admitted a chronic, complex, medically fragile 8 year old with Covid-related pneumonia and ARDS who has been admitted to the PICU multiple times in the past. Would you allow any visitors from the same household? (yes/no) Would you allow an exception to the restricted visitation for:

- Admission process
- Child deteriorates and needs intubated
- Parent not coping well, becomes highly agitated and anxious
- Parent highly distressed/upset
- Child highly distressed
- Discussions of withdrawal of life support
- Visitation prior to WLS
- Withdrawal of Life Support

31. You have admitted a previously-well 3 year old with Covid-19-related cardiomyopathy (negative swab now). Would you alter the rules (and how) for:

- Admission process
- Child deteriorates and needs intubated
- Parent not coping well, becomes highly agitated and anxious

Appendix 1, as supplied by authors. Appendix to: Foster JR, Lee LA, Seabrook JA, et al. Family presence in Canadian PICUs during the COVID-19 pandemic: a mixed-methods environmental scan of policy and practice.

CMAJ Open 2022. DOI:10.9778/cmajo.20210202. Copyright © 2022 The Author(s) or their employer(s).

To receive this resource in an accessible format, please contact us at [cmajgroup@cmaj.ca](mailto:cmajgroup@cmaj.ca).

- Parent highly distressed/upset
- Child highly distressed
- Peri-ECMO cannulation (if not offered in their centre “transfer to another institution”)
- Delivering news of devastating stroke
- Discussions of withdrawal of life support
- Visitation prior to WLS
- Withdrawal of Life Support

This ends the questionnaire about family presence policy and practice. Thank you for your time and effort in answering these questions. We will send you an e-mail copy of the recorded answers for you to review so that you can ensure we have accurately captured your answers and so you can provide any information that is still needed. If you have any paper or electronic copies of policies that you are able to provide this would be very helpful.
