# Supplementary material for: Family presence in Canadian PICUs during the COVID-19 pandemic: a mixed-methods environmental scan of policy and practice
Source: PubMed Central journal article supplement — CMAJ Open. 2022 Jul 5;10(3):E622–32. doi: 10.9778/cmajo.20210202 (PMC9262350; doi:10.9778/cmajo.20210202), 2022-07-05
Supplement: open-2021-0202-2-at.pdf [file open-2021-0202-2-at.pdf]

## **Appendix 2: Survey development process**

### Pre-testing information:

Method 1: Paper review of questionnaire for question relevance, redundancy, readability

Pre-test #1 participants:

1. Director, Children's Health
2. Adult intensive care unit physician
3. Pediatric intensive care unit physician

Method 2: Telephone interview with discussion of question content, wording

Pre-test #2 participants:

1. Adult intensive care unit physician chief
2. Pediatric intensive care unit manager

### Interviewer training:

Both interviewers were involved in all stages of questionnaire conception and development and were familiar with the survey content.

Each interviewer practiced the survey with health care professionals in fields adjacent to the target population (PICU physician, children's health manager).

### Pilot testing:

Given the small population of Canadian PICU leadership, formalized pilot testing was not feasible, and the results of all participants were included. After the first two interviews performed by each interviewer, JRF and LAL met to discuss questionnaire flow and adjust the order of questions.
