# Supplementary material for: Family presence in Canadian PICUs during the COVID-19 pandemic: a mixed-methods environmental scan of policy and practice
Source: PubMed Central journal article supplement — CMAJ Open. 2022 Jul 5;10(3):E622–32. doi: 10.9778/cmajo.20210202 (PMC9262350; doi:10.9778/cmajo.20210202), 2022-07-05
Supplement: open-2021-0202-3-at.pdf [file open-2021-0202-3-at.pdf]

Appendix 3: Pre-pandemic policy elements by hospital for all Canadian PICUs, abstracted from publicly accessible documents

| Hospital                                      | Policy information source (PICU, Hospital, Health authority/provincial) | Policy specificity (PICU, pediatric, non-specific) | Document type(s)  | # people at bedside: non-COVID | Switching practice to enable second parent/support | Parental/support person presence hours | Non-parent family and visitors | Approach to minor-age siblings | Family/ visitors with contagious infection** | In-hospital mobility       |
|-----------------------------------------------|-------------------------------------------------------------------------|----------------------------------------------------|-------------------|--------------------------------|----------------------------------------------------|----------------------------------------|--------------------------------|--------------------------------|----------------------------------------------|----------------------------|
| Janeway Children's Hospital                   | Health authority                                                        | PICU specific                                      | policy, website   | 2 strict                       | Unnecessary                                        | Leave for rounds/handover              | Restricted times/freq          | With restrictions              | Not allowed                                  | Not specified              |
| IWK Health                                    | Hospital                                                                | Pediatric                                          | Website           | Unlimited                      | Unnecessary                                        | 24/7                                   | unrestricted                   | Unrestricted                   | Not specified                                | Not specified              |
| CHU de Québec - Université de Laval           | PICU                                                                    | PICU specific                                      | Website           | 2 strict                       | Unnecessary                                        | 24/7                                   | Restricted times/freq          | With restrictions              | Screened for                                 | Not specified              |
| CIUSSS de l'Estrie - CHU Sherbrooke           | No policy or information found                                          |                                                    |                   |                                |                                                    |                                        |                                |                                |                                              |                            |
| Montreal Children's Hospital                  | PICU                                                                    | PICU specific                                      | brochure, website | 2 strict                       | Unnecessary                                        | 1 parent only for sleep                | Restricted times/freq          | Unrestricted                   | Not allowed                                  | Encouraged to stay in toom |
| CHU Sainte-Justine                            | PICU                                                                    | PICU specific                                      | Booklet           | 2 strict                       | Unnecessary                                        | 1 parent only for sleep                | Restricted times/freq          | With restrictions              | Screened for                                 | Encouraged to stay in toom |
| Kingston Health Sciences Centre               | Hospital                                                                | Pediatric                                          | Website           | 2 flexible                     | Unnecessary                                        | 24/7                                   | Restricted times/freq          | With restrictions              | Not allowed                                  | Not specified              |
| Children's Hospital of Eastern Ontario        | Hospital                                                                | Pediatric                                          | Website           | 2 strict                       | Unnecessary                                        | 1 parent only for sleep                | Restricted times/freq          | With restrictions              | Not allowed                                  | Not specified              |
| Hospital for Sick Children - cardiac          | Hospital                                                                | Pediatric                                          | Website           | Unlimited                      | Unnecessary                                        | 24/7                                   | Restricted times/freq          | With restrictions              | Screened for                                 | Not specified              |
| Hospital for Sick Children - medical surgical | Hospital                                                                | Pediatric                                          | Website           | Unlimited                      | Unnecessary                                        | 24/7                                   | Restricted times/freq          | With restrictions              | Screened for                                 | Not specified              |
| McMaster Children's Hospital                  | PICU                                                                    | PICU specific                                      | Website           | 2 strict                       | Unnecessary                                        | 24/7                                   | Switch any time                | Unrestricted                   | Not allowed                                  | Leave for eating           |

Appendix 3, as supplied by authors. Appendix to: Foster JR, Lee LA, Seabrook JA, et al. Family presence in Canadian PICUs during the COVID-19 pandemic: a mixed-methods environmental scan of policy and practice. *CMAJ Open* 2022. DOI:10.9778/cmajo.20210202. Copyright © 2022 The Author(s) or their employer(s). To receive this resource in an accessible format, please contact us at [cmajgroup@cmaj.ca](mailto:cmajgroup@cmaj.ca).

|                                                        |                                |               |                  |            |             |                          |                       |                   |             |               |
|--------------------------------------------------------|--------------------------------|---------------|------------------|------------|-------------|--------------------------|-----------------------|-------------------|-------------|---------------|
| Children's Hospital at London Health Sciences Centre   | PICU                           | PICU specific | Website          | Unlimited  | Unnecessary | 24/7                     | unrestricted          | Not specified     | Not allowed | Not specified |
| Children's Hospital - Health Sciences Centre, Winnipeg | hospital                       | Pediatric     | Website          | 2 flexible | Unnecessary | 24/7                     | Restricted times/freq | With restrictions | Not allowed | Not specified |
| Jim Pattison Children's Hospital                       | PICU                           | PICU specific | Website          | Unlimited  | Unnecessary | 24/7                     | Unrestricted          | Unrestricted      | Not allowed | Not specified |
| Stollery Children's Hospital - cardiac                 | PICU                           | PICU specific | website, policy  | 2 flexible | Unnecessary | 24/7                     | Restricted times/freq | Unrestricted      | Not allowed | Not specified |
| Stollery Children's Hospital - medical surgical        | PICU                           | PICU specific | website, policy  | 2 flexible | Unnecessary | 24/7                     | Restricted times/freq | Unrestricted      | Not allowed | Not specified |
| Alberta Children's                                     | Hospital                       | Pediatric     | policy, brochure | Unlimited  | Unnecessary | 1 parent leave for sleep | Restricted times/freq | With restrictions | Not allowed | Not specified |
| BC Children's Hospital                                 | PICU                           | PICU specific | Website          | 2 flexible | Unnecessary | 24/7                     | Switch any time       | Not specified     | Not allowed | Not specified |
| Victoria General Hospital                              | No policy or information found |               |                  |            |             |                          |                       |                   |             |               |
| Total not specified                                    | N/A                            | N/A           | N/A              | 0          | 0           | 0                        | 0                     | 2                 | 1           | 14            |

\*NS = Not specified, includes when elements were not reported or when they were discussed but without clear guidance

\*\*Screened = Screened for infection, unclear what actions taken if screen positive
