# Supplementary material for: Family presence in Canadian PICUs during the COVID-19 pandemic: a mixed-methods environmental scan of policy and practice
Source: PubMed Central journal article supplement — CMAJ Open. 2022 Jul 5;10(3):E622–32. doi: 10.9778/cmajo.20210202 (PMC9262350; doi:10.9778/cmajo.20210202), 2022-07-05
Supplement: open-2021-0202-4-at.pdf [file open-2021-0202-4-at.pdf]

Appendix 4: Early COVID-19 pandemic (March to May 2020) restricted family presence policy elements by hospital for all Canadian PICUs, abstracted from publicly accessible documents

| Hospital                                                  | Policy information source (PICU, Hospital, Health authority/provincial) | Policy specificity (PICU-specific, pediatric, non-specific) | Document type(s)         | # people at bedside: non-COVID | Switching practice to enable second parent/support | # people at bedside: COVID +/-suspect | Switching practice to enable second parent/support COVID +/-suspect | Parental/support person presence hours | Non-parent family and visitors | Approach to minor-age siblings  | Family/visitors with contagious infection* | In-hospital mobility | Need for exception specifications |
|-----------------------------------------------------------|-------------------------------------------------------------------------|-------------------------------------------------------------|--------------------------|--------------------------------|----------------------------------------------------|---------------------------------------|---------------------------------------------------------------------|----------------------------------------|--------------------------------|---------------------------------|--------------------------------------------|----------------------|-----------------------------------|
| Janeway Children's Hospital; Saint John's, Newfoundland   | Health authority                                                        | Pediatric                                                   | website, social media    | Not Specified                  | Not Specified                                      | Not Specified                         | Not Specified                                                       | Not Specified                          | Not allowed                    | Not allowed or only end of life | Not Specified                              | Not Specified        | End of life                       |
| IWK Health; Halifax, Nova Scotia                          | Hospital                                                                | Pediatric                                                   | website                  | One                            | Not Specified                                      | Not Specified                         | Not Specified                                                       | Not Specified                          | Not Specified                  | Not allowed or only end of life | Screened                                   | Not Specified        | Not Specified                     |
| CHU de Québec - Université de Laval; Québec City, Québec, | Hospital                                                                | Pediatric                                                   | website                  | One                            | Not Specified                                      | Not Specified                         | Not Specified                                                       | Not Specified                          | Not allowed                    | Not allowed or only end of life | Not Specified                              | Not Specified        | End of life                       |
| CIUSSS de l'Estrie - CHU Sherbrooke; Sherbrooke, Québec   | Health authority                                                        | Pediatric                                                   | website                  | Not Specified                  | Not Specified                                      | Not Specified                         | Not Specified                                                       | Not Specified                          | Not Specified                  | Not Specified                   | Not allowed                                | Not Specified        | Not Specified                     |
| Montreal Children's Hospital; Montreal, Québec            | Hospital                                                                | Pediatric                                                   | website                  | Two strict                     | Unnecessary                                        | Not Specified                         | Not Specified                                                       | Not Specified                          | Not allowed                    | Not allowed or only end of life | Not Specified                              | Not Specified        | Not Specified                     |
| CHU Sainte-Justine; Montreal, Québec                      | Hospital                                                                | Pediatric                                                   | website                  | Two strict                     | Unnecessary                                        | Not Specified                         | Not Specified                                                       | Not Specified                          | Not allowed                    | Not allowed or only end of life | Not allowed                                | Not Specified        | Not Specified                     |
| Kingston Health Sciences Centre; Kingston, Ontario        | Hospital                                                                | Pediatric                                                   | original policy, website | Not Specified                  | Not Specified                                      | Not Specified                         | Not Specified                                                       | Not Specified                          | Not allowed                    | Not allowed or only end of life | Screened                                   | Not Specified        | End of life                       |
| Children's Hospital of Eastern Ontario; Ottawa, Ontario   | Hospital                                                                | Pediatric                                                   | website                  | Two strict                     | At restricted times/frequency                      | Not Specified                         | Not Specified                                                       | 24/7                                   | Not allowed                    | Not allowed or only end of life | Screened                                   | Not Specified        | Not Specified                     |
| Hospital for Sick Children – cardiac; Toronto, Ontario    | hospital                                                                | Pediatric                                                   | website                  | One                            | Not Specified                                      | Not Specified                         | Not Specified                                                       | Not Specified                          | Not allowed                    | Not allowed or only end of life | Screened                                   | Not Specified        | Not Specified                     |

Appendix 4, as supplied by authors. Appendix to: Foster JR, Lee LA, Seabrook JA, et al. Family presence in Canadian PICUs during the COVID-19 pandemic: a mixed-methods environmental scan of policy and practice. *CMAJ Open* 2022. DOI:10.9778/cmajo.20210202. Copyright © 2022 The Author(s) or their employer(s). To receive this resource in an accessible format, please contact us at [cmajgroup@cmaj.ca](mailto:cmajgroup@cmaj.ca).

|                                                                           |                  |               |                                                |               |                               |               |                               |               |               |                                 |               |                      |                          |
|---------------------------------------------------------------------------|------------------|---------------|------------------------------------------------|---------------|-------------------------------|---------------|-------------------------------|---------------|---------------|---------------------------------|---------------|----------------------|--------------------------|
| Hospital for Sick Children - medical surgical; Toronto, Ontario           | Hospital         | Pediatric     | website                                        | One           | Not Specified                 | Not Specified | Not Specified                 | Not Specified | Not allowed   | Not allowed or only end of life | Screened      | Not Specified        | Not Specified            |
| McMaster Children's Hospital; Hamilton, Ontario                           | Hospital         | Pediatric     | website                                        | Not Specified | Not Specified                 | One           | Not allowed                   | Not Specified | Not Specified | Not Specified                   | Not Specified | Not Specified        | Not Specified            |
| Children's Hospital at London Health Sciences Centre; London, Ontario     | Hospital         | Pediatric     | news release                                   | One           | Not Specified                 | Not Specified | Not Specified                 | Not Specified | Not allowed   | Not allowed or only end of life | Not allowed   | Not Specified        | Not Specified            |
| Children's Hospital - Health Sciences Centre, Winnipeg; Winnipeg, Ontario | Hospital         | PICU specific | website                                        | One           | Not Specified                 | Not Specified | Not Specified                 | Not Specified | Not Specified | At manager discretion           | Not Specified | Not Specified        | On compassionate grounds |
| Jim Pattison Children's Hospital; Saskatoon, Saskatchewan                 | Health authority | PICU specific | original policy, website, news release, poster | One           | Not allowed                   | One           | Not allowed                   | 24/7          | Not allowed   | Not allowed or only end of life | Not allowed   | not allowed to leave | On compassionate grounds |
| Stollery Children's Hospital – cardiac; Edmonton, Alberta                 | Health authority | Non-specific  | original policy, website                       | Not Specified | Not Specified                 | Not Specified | Not Specified                 | Not Specified | Not Specified | Not allowed or only end of life | Not allowed   | Not Specified        | End of life              |
| Stollery Children's Hospital - medical surgical; Edmonton, Alberta        | Health authority | Non-specific  | original policy, website                       | Not Specified | Not Specified                 | Not Specified | Not Specified                 | Not Specified | Not Specified | Not allowed or only end of life | Not allowed   | Not Specified        | End of life              |
| Alberta Children's Hospital; Calgary, Alberta                             | Health authority | Non-specific  | original policy, website                       | Not Specified | Not Specified                 | Not Specified | Not Specified                 | Not Specified | Not Specified | Not allowed or only end of life | Not allowed   | Not Specified        | End of life              |
| BC Children's Hospital; Vancouver, British Columbia                       | Hospital         | Pediatric     | website                                        | Two strict    | Unnecessary                   | Not Specified | Not Specified                 | Not Specified | Not Specified | Not allowed or only end of life | Screened      | Not Specified        | Not Specified            |
| Victoria General Hospital; Victoria, British Columbia                     | Health authority | Pediatric     | website                                        | One           | At restricted times/frequency | One           | At restricted times/frequency | Not Specified | Not Specified | Not allowed or only end of life | Not allowed   | Not Specified        | End of life              |
| Total not specified (n, %)                                                | N/A              | N/A           | N/A                                            | 7 (37%)       | 13 (68%)                      | 16 (84%)      | 16 (84%)                      | 17 (89%)      | 9 (47%)       | 2 (11%)                         | 5 (26%)       | 18 (95%)             | 10 (53%)                 |

Appendix 4, as supplied by authors. Appendix to: Foster JR, Lee LA, Seabrook JA, et al. Family presence in Canadian PICUs during the COVID-19 pandemic: a mixed-methods environmental scan of policy and practice. *CMAJ Open* 2022. DOI:10.9778/cmajo.20210202. Copyright © 2022 The Author(s) or their employer(s). To receive this resource in an accessible format, please contact us at [cmajgroup@cmaj.ca](mailto:cmajgroup@cmaj.ca).

\* Switching practices = PICU or hospital practice when number at the bedside is limited to enable one caregiver to leave and be replaced by a different caregiver at the bedside. For the purposes of this column, switches are designated “unnecessary” if both parents or two caregivers are enabled to be present at the same time.

\*\* Screened = screened for infection, without indication of action taken if screen positive

\*\*\* In-hospital mobility refers to whether caregivers were allowed by the rules to leave the PICU room and move around the hospital for any reason including accessing basic needs
